# Supplementary material for: Epoxidized Ionic Liquids as Processing Auxiliaries of Poly(Lactic Acid) Matrix: Influence on the Manufacture, Structural and Physical Properties
Source: MDPI journal article supplement (doi:10.3390/nano13091476), 2023-04-26
Supplement: s1 [file s1]

Supplementary Materials

# Epoxidized Ionic Liquids as Processing Auxiliaries of Poly(Lactic Acid) Matrix: Influence on the Manufacture, Structural and Physical Properties

Claudia Merlini <sup>1,2</sup>, Vanessa Oliveira Castro <sup>2,3</sup>, Gabriel Perli <sup>2</sup>, Younes El Omari <sup>2</sup> and Sébastien Livi <sup>2,\*</sup>

<sup>1</sup> Materials Engineering Special Coordination, Federal University of Santa Catarina (UFSC), Blumenau 89036-002, SC, Brazil

<sup>2</sup> Université de Lyon, CNRS, Université Claude Bernard Lyon 1, INSA Lyon, Université Jean Monnet, UMR 5223, Ingénierie des Matériaux Polymères, CEDEX F-69621 Villeurbanne, France

<sup>3</sup> Mechanical Engineering Department, Federal University of Santa Catarina, Florianopolis 88040-900, SC, Brazil

\* Correspondence: sebastien.livi@insa-lyon.fr

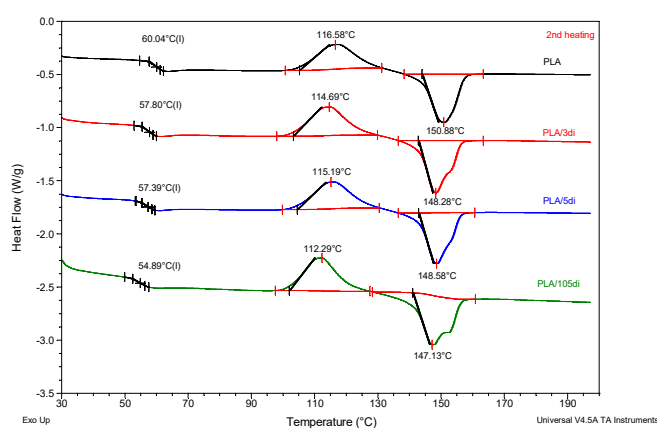

(a)

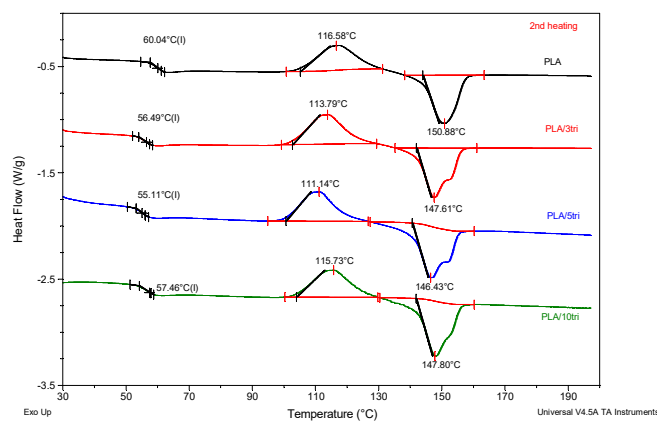

(b)

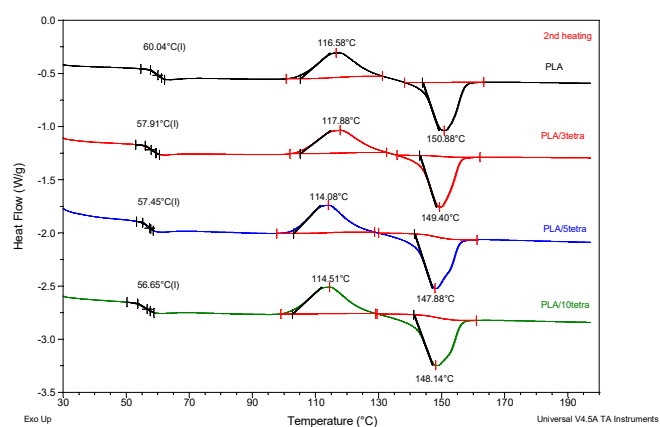

(c)

**Figure S1.** DSC curves with 1st heating and 2nd heating of PLA with different ILs: (a) PLA/di, (b) PLA/tri and (c) PLA/tetra.
